# Supplementary material
Source: PubMed Central journal article supplement (PMC6377944)
Supplement: NIHMS819557-supplement-Supplementary___Appendix__online_only_material__etc__.pdf [file NIHMS819557-supplement-Supplementary___Appendix__online_only_material__etc__.pdf]

# **Copy Number Variation Is An Important Contributor to the Genetic Causality of Inherited Retinal Degenerations**

**Short title:** Copy Number Variation in Inherited Retinal Degenerations

Kinga M. Bujakowska<sup>1</sup>, Rosario Fernandez-Godino<sup>1</sup>, Emily Place<sup>1</sup>, Mark Cosugar<sup>1</sup>, Daniel Navarro-Gomez<sup>1</sup>, Joseph White<sup>1</sup>, Emma C. Bedoukian<sup>2</sup>, Xiaosong Zhu<sup>2</sup>, Hongbo M. Xie<sup>3</sup>, Xiaowu Gai<sup>4</sup>, Bart P. Leroy<sup>2,5</sup>, Eric A. Pierce<sup>1</sup>

<sup>1</sup>Ocular Genomics Institute, Massachusetts Eye and Ear Infirmary, Department of Ophthalmology, Harvard Medical School, Boston, Massachusetts, MA 02114, USA

<sup>2</sup>Ophthalmic Genetics & Visual Electrophysiology, Division of Ophthalmology, The Children's Hospital of Philadelphia, PA 19104, USA

<sup>3</sup>Department of BioMedical Health Informatics, Children's Hospital of Philadelphia, PA 19104

<sup>4</sup>Center for Personalized Medicine, Children's Hospital Los Angeles, 4650 Sunset Blvd, Los Angeles , CA 90027, USA

<sup>5</sup>Department of Ophthalmology & Center for Medical Genetics, Ghent University Hospital & Ghent University, Ghent 9000, Belgium

Corresponding author: Dr. Eric Pierce

Massachusetts Eye and Ear, 243 Charles Street, Boston, MA 02114

[eric\\_pierce@meei.harvard.edu](mailto:eric_pierce@meei.harvard.edu), Tel.: (617)-573-6917, Fax: (617)-573-6901

Supplementary information includes three tables, two figures and additional references.

**Table S1.** PCR primers (Primers in bold were used for amplification through the breakpoint. Sequences of the reference primers were taken from<sup>1</sup>)

|                               | Forward                             | Reverse                        |
|-------------------------------|-------------------------------------|--------------------------------|
| <b>Reference primers</b>      |                                     |                                |
| GPR15_qPCR                    | GGTCCCTGGTGGCCTTAATT                | TTGCTGGTAATGGGCACACA           |
| ZNF80_qPCR                    | CTGTGACCTGCAGCTCATCCT               | TAAGTTCTCTGACGTTGACTGATGTG     |
| <b>OGI-086 family</b>         |                                     |                                |
| OSKAR_ex4_qPCR                | CAGCTTCATACCACCCTAAG                | TTGAAAAGTCCAAATCTCCAAG         |
| OSKAR_ex3_qPCR                | CATTATAGGTGAGTACTGAAGAC             | CTTGTTCTAGGTCATATGGTCAC        |
| PRPF31_ex2_qPCR               | GCTCTTAGCTGATCTCGAAG                | GAAAGATCCAGCTGTGTCTC           |
| PRPF31_ex8_qPCR               | TGACCAACCTCTCCAAGATG                | ATGTCACTGTGGTAGATGTAG          |
| PRPF31_ex10_qPCR              | ACGAACTGAAGGATGAGATC                | CTTCTCCGCTGTCCATC              |
| PRPF31_ex14_qPCR              | CAGAGAAGAAGGTGGCTGAG                | AGTCATTCAGGTGGACATAAG          |
| PRPF31_100bp_downstream_qPCR  | CCC GTTACTTTCTCGTCATG               | GTTGGCAGCCACATCATTG            |
| PRPF31_2K_downstream_qPCR     | GAGGTTAAGGAAGAGCAACTC               | <b>CTTG TAGGT CAGGT GACTAG</b> |
| PRPF31_6K_downstream_qPCR     | CTAAACTTGACGGACGACTTC               | GTCGTGCTGATTGGATGTATC          |
| CNOT3_ex2_qPCR                | TCTCCAATCTCTCCTAGCAG                | GAAGTCAGTCTAGTACCTTG           |
| <b>OSKAR_intron3</b>          | <b>GACAGAGAGAACTGGTCTC</b>          |                                |
| <b>OGI-014 family</b>         |                                     |                                |
| EYS_ex15_6K_upstream_qPCR     | TGGACAAGTCACAGTATATGAG              | GTATAAGAAGTACAGCACTGAGT        |
| EYS_ex15_3K_upstream_qPCR     | AACTTGGAAGAGAACTCCATTTTC            | CAGTG TACAAGAGTCAGTCAC         |
| EYS_ex15_2K_upstream_qPCR     | GGAACAGTTATTTTAAATTACTGGAATC        | TTATTCATCAGTATCTTACTTGATTCA    |
| EYS_ex15_1K_upstream_qPCR     | CTAAGATGCGTTCTGTAATCTC              | GATAATGCCAGCCCAGTTTC           |
| EYS_ex15_qPCR                 | TTCTCTTAGAGCTACCAGTG                | GGTGG AATTGTTCTTGCAAG          |
| EYS_ex16_qPCR                 | TGTGAGTGTACATCTGGATG                | GATGGTAGATTCATGACAAAG          |
| EYS_ex17_qPCR                 | CATACTCTTTGCAGAATTTGAAG             | GTTGACCATATCTTCACAGTC          |
| EYS_ex18_qPCR                 | AAGGTGTATTTGCAGACCTG                | GTTTGT CAGATCCACACATG          |
| EYS_ex18_9.2K_downstream_qPCR | ATTACAATAACAGTGGCTAGTG              | TCACAATATGCTTGTGTAATG          |
| EYS_ex18_9.6K_downstream_qPCR | GAAGTGTGGTTCATGAATGCAG              | CTGATAAGGACTTTTAAGCCTATG       |
| EYS_ex18_12.7K_qPCR           | TTATGGGTAGGTGTCAGAATC               | TTTGT CATGATGAAGATGTGG         |
| <b>OGI-046 family</b>         |                                     |                                |
| ZAP70_qPCR                    | TGGACACGAGCGTGATGAG                 | GTTCAATGTCAGCTATGAGGAG         |
| SNRNP200_ex21_qPCR            | TCTATGGCATCTCTCATGATG               | GATTGTTCTTGTCCAGCATCAG         |
| SNRNP200_ex22_qPCR            | GTGCAGACTTACAACCAGCTGC              | CTCTCTACTGTGATGTTCTTG          |
| SNRNP200_ex23_qPCR            | TTGAGGAACCCAGTGCTAAG                | CAAATTCAAGGTTTCATCTTTTAGAAG    |
| SNRNP200_ex25_qPCR            | GAATGCTGCTTCTTTGCTTAG               | GTT CAGGGTCTTGTCTGTAAG         |
| SNRNP200_ex45_qPCR            | TCCATGCTCATCTTGATTTCTG              | GTC ACTCATGAAGTACAGAGT         |
| ANKDR36_ex41+100bp_qPCR       | GCTGCACGTTCTGATTCACC                | TGCTCTCCATGTTTCTTCTCC          |
| FAHD2B_ex8_qPCR               | ATGTGTCTGACGGAAGGGCT                | GCCATCACACCACCTTGTTG           |
| GPAT2_ex1_qPCR                | GGCGGGAATGAGTCCTTG TG               | GAGCTACCCCAAGATGTGCG           |
| ADRA2B_qPCR                   | TATCGGCCTTCCCTTGGAGA                | CTCGGTGCCCTTCCAAATCT           |
| <b>OGI-036 family</b>         |                                     |                                |
| OPN1LW_CpG38_2K_upstream      | <b>TAATTACAAAGGATTTGCAGGGAACAAG</b> | AATGGAGAAATAGAGAAAGGGCAAGAG    |
| OPN1LW_CpG38_1K_upstream      | TCAAATCATCAGATCCAAGACTCTAAGACA      | AAAGCTTTCTACTGCCTTTGAACAGAAAAC |
| OPN1LW_CpG38                  | CGACCAGGATCCACCCTTTC                | GCGGAAGGAGAGAGACATAATGG        |

|                   |                        |                             |
|-------------------|------------------------|-----------------------------|
| OPN1LW_LCRcore    | GCCCCACAGGTGCTGAGTGACT | AGAGTGGAGGTGGCAGAGGTGGGAG   |
| <b>OPN1LW_ex5</b> |                        | <b>CAGACGCAGTACGCAAAGAT</b> |

**Table S2.** Computationally predicted NAHR-prone regions in the genome

| Chromosome | Start       | End         | IRD gene               | Comments                                                                                                                        |
|------------|-------------|-------------|------------------------|---------------------------------------------------------------------------------------------------------------------------------|
| chr1       | 88,000      | 712,554     |                        |                                                                                                                                 |
| chr1       | 1,567,836   | 1,683,632   | <i>GNB1</i>            | 33.1kb away from NAHR, CNVs never described before                                                                              |
| chr1       | 12,840,257  | 13,774,009  |                        |                                                                                                                                 |
| chr1       | 16,825,367  | 21,784,068  | <i>EMC1, PLA2G5</i>    | direct overlap with NAHR, CNVs never described before                                                                           |
| chr1       | 25,594,515  | 25,751,819  |                        |                                                                                                                                 |
| chr1       | 39,975,198  | 40,242,350  |                        |                                                                                                                                 |
| chr1       | 47,304,216  | 47,622,817  |                        |                                                                                                                                 |
| chr1       | 103,785,265 | 104,003,638 |                        |                                                                                                                                 |
| chr1       | 104,161,927 | 104,317,467 |                        |                                                                                                                                 |
| chr1       | 108,764,242 | 109,015,286 |                        |                                                                                                                                 |
| chr1       | 121,361,171 | 121,472,478 |                        |                                                                                                                                 |
| chr1       | 142,542,267 | 143,544,525 |                        |                                                                                                                                 |
| chr1       | 143,644,525 | 149,847,929 |                        |                                                                                                                                 |
| chr1       | 161,479,597 | 161,646,894 |                        |                                                                                                                                 |
| chr1       | 196,711,704 | 196,920,352 |                        |                                                                                                                                 |
| chr1       | 222,650,092 | 228,173,643 |                        |                                                                                                                                 |
| chr1       | 248,584,239 | 248,834,181 |                        |                                                                                                                                 |
| chr2       | 77,901,296  | 92,254,230  |                        |                                                                                                                                 |
| chr2       | 96,080,043  | 98,250,348  | <i>SNRNP200, CNNM4</i> | direct overlap with NAHR, CNVs in <i>SNRNP200</i> never described before and in <i>CNNM4</i> only affecting certain exons       |
| chr2       | 100,697,051 | 113,207,451 | <i>NPHP1, MERTK</i>    | direct overlap with NAHR, CNVs affecting the entire gene ( <i>NPHP1</i> ) or certain exons ( <i>MERTK</i> ) observed previously |
| chr2       | 130,735,169 | 132,308,920 |                        |                                                                                                                                 |

|      |             |             |                  |                                                                                                                     |
|------|-------------|-------------|------------------|---------------------------------------------------------------------------------------------------------------------|
| chr2 | 243,088,899 | 243,189,373 |                  |                                                                                                                     |
| chr3 | 123,675,719 | 125,715,090 |                  |                                                                                                                     |
| chr3 | 195,349,462 | 197,394,388 | <i>PCYT1A</i>    | direct overlap with NAHR, CNVs never described before                                                               |
| chr4 | 8,943,507   | 9,552,539   |                  |                                                                                                                     |
| chr4 | 49,154,264  | 49,637,650  |                  |                                                                                                                     |
| chr4 | 69,678,647  | 69,889,161  |                  |                                                                                                                     |
| chr4 | 70,035,680  | 70,269,147  |                  |                                                                                                                     |
| chr4 | 75,282,464  | 75,493,261  |                  |                                                                                                                     |
| chr4 | 119,521,346 | 120,361,492 |                  |                                                                                                                     |
| chr4 | 144,706,829 | 145,070,347 |                  |                                                                                                                     |
| chr5 | 235,806     | 1,617,110   |                  |                                                                                                                     |
| chr5 | 17,497,010  | 17,634,140  |                  |                                                                                                                     |
| chr5 | 21,504,597  | 29,456,424  |                  |                                                                                                                     |
| chr5 | 68,829,716  | 70,660,316  |                  |                                                                                                                     |
| chr5 | 98,726,330  | 99,736,930  |                  |                                                                                                                     |
| chr5 | 175,329,459 | 177,482,249 |                  |                                                                                                                     |
| chr6 | 26,702,386  | 26,798,341  |                  |                                                                                                                     |
| chr6 | 31,948,308  | 31,999,999  | <i>STK19</i>     | direct overlap with NAHR, CNVs affecting the entire gene observed previously                                        |
| chr6 | 52,610,640  | 52,680,222  |                  |                                                                                                                     |
| chr6 | 57,686,350  | 58,726,206  |                  |                                                                                                                     |
| chr6 | 167,579,270 | 167,806,139 |                  |                                                                                                                     |
| chr7 | 5,016,599   | 5,778,292   |                  |                                                                                                                     |
| chr7 | 29,692,579  | 35,231,074  | <i>RP9, BBS9</i> | direct overlap with NAHR, CNVs in <i>RP9</i> never described before and in <i>BBS9</i> only affecting certain exons |
| chr7 | 35,953,035  | 56,496,499  |                  |                                                                                                                     |
| chr7 | 57,670,560  | 57,914,373  |                  |                                                                                                                     |
| chr7 | 61,056,562  | 61,845,697  |                  |                                                                                                                     |
| chr7 | 62,678,540  | 62,985,366  |                  |                                                                                                                     |
| chr7 | 64,471,586  | 65,367,315  |                  |                                                                                                                     |

|       |             |             |                    |                                                                                                                               |
|-------|-------------|-------------|--------------------|-------------------------------------------------------------------------------------------------------------------------------|
| chr7  | 65,894,273  | 76,691,789  | <i>KCTD7</i>       | direct overlap with NAHR, CNVs only affecting certain exons observed before                                                   |
| chr7  | 101,982,123 | 102,319,899 |                    |                                                                                                                               |
| chr7  | 143,218,861 | 143,571,789 |                    |                                                                                                                               |
| chr7  | 143,884,041 | 144,074,376 |                    |                                                                                                                               |
| chr7  | 149,586,782 | 153,864,361 | <i>NUB1</i>        | direct overlap with NAHR, CNVs never described before                                                                         |
| chr8  | 2,180,177   | 2,343,982   |                    |                                                                                                                               |
| chr8  | 7,005,690   | 7,999,583   |                    |                                                                                                                               |
| chr8  | 11,895,289  | 12,334,342  |                    |                                                                                                                               |
| chr8  | 12,408,472  | 12,525,492  |                    |                                                                                                                               |
| chr8  | 86,552,568  | 86,841,605  |                    |                                                                                                                               |
| chr8  | 142,754,395 | 142,970,306 |                    |                                                                                                                               |
| chr8  | 145,187,380 | 145,501,700 |                    |                                                                                                                               |
| chr9  | 33,382,122  | 47,317,679  |                    |                                                                                                                               |
| chr9  | 65,817,023  | 71,031,684  |                    |                                                                                                                               |
| chr9  | 85,042,171  | 94,872,062  |                    |                                                                                                                               |
| chr9  | 97,069,068  | 99,789,772  |                    |                                                                                                                               |
| chr10 | 4,968,124   | 5,074,055   |                    |                                                                                                                               |
| chr10 | 14,974,843  | 15,068,904  |                    |                                                                                                                               |
| chr10 | 17,777,711  | 18,221,580  |                    |                                                                                                                               |
| chr10 | 43,189,721  | 45,644,459  |                    |                                                                                                                               |
| chr10 | 46,171,743  | 52,544,109  | <i>RBP3, ERCC6</i> | direct overlap with NAHR, CNVs in <i>RBP3</i> never described before and entire gene CNVs in <i>ERCC6</i> observed previously |
| chr10 | 81,260,743  | 89,260,363  | <i>CDHR1, RGR</i>  | direct overlap with NAHR, CNVs never described before                                                                         |
| chr10 | 135,236,150 | 135,394,059 |                    |                                                                                                                               |
| chr11 | 3,268,109   | 3,359,713   |                    |                                                                                                                               |
| chr11 | 4,252,196   | 4,363,052   |                    |                                                                                                                               |
| chr11 | 48,416,917  | 51,552,637  |                    |                                                                                                                               |
| chr11 | 55,046,069  | 55,661,495  |                    |                                                                                                                               |

|       |             |             |                    |                                                                                            |
|-------|-------------|-------------|--------------------|--------------------------------------------------------------------------------------------|
| chr11 | 58,803,450  | 58,881,318  |                    |                                                                                            |
| chr11 | 67,477,730  | 71,515,825  | <i>LRP5</i>        | direct overlap with NAHR, CNVs affecting certain exons observed before                     |
| chr11 | 89,475,576  | 89,830,683  |                    |                                                                                            |
| chr12 | 9,436,203   | 9,600,866   |                    |                                                                                            |
| chr12 | 63,923,418  | 64,146,247  |                    |                                                                                            |
| chr12 | 131,766,776 | 132,169,194 |                    |                                                                                            |
| chr13 | 19,773,434  | 25,555,912  | <i>IFT88</i>       | direct overlap with NAHR, CNVs affecting the entire gene observed previously               |
| chr13 | 52,771,866  | 53,187,379  |                    |                                                                                            |
| chr13 | 64,290,924  | 64,418,388  |                    |                                                                                            |
| chr14 | 19,361,502  | 20,194,548  |                    |                                                                                            |
| chr14 | 24,421,111  | 24,503,512  | <i>NRL</i>         | 46kb away from NAHR, CNVs never described before                                           |
| chr14 | 74,000,098  | 74,052,473  |                    |                                                                                            |
| chr14 | 106,044,744 | 106,244,200 |                    |                                                                                            |
| chr15 | 20,198,575  | 32,925,115  | <i>OCA2, TRPM1</i> | direct overlap with NAHR, CNVs affecting the entire gene observed previously in both cases |
| chr15 | 34,671,002  | 34,875,898  |                    |                                                                                            |
| chr15 | 43,851,135  | 44,041,710  |                    |                                                                                            |
| chr15 | 45,109,634  | 45,375,390  |                    |                                                                                            |
| chr15 | 72,911,806  | 78,251,250  | <i>BBS4</i>        | direct overlap with NAHR, CNVs affecting certain exons observed before                     |
| chr15 | 78,259,695  | 79,078,694  | <i>CIB2</i>        | direct overlap with NAHR, CNVs affecting certain exons observed before                     |
| chr15 | 82,483,003  | 85,815,511  |                    |                                                                                            |
| chr15 | 100,319,313 | 102,334,597 |                    |                                                                                            |
| chr16 | 2,584,142   | 2,741,054   |                    |                                                                                            |
| chr16 | 12,018,586  | 30,346,868  | <i>ABCC6, CLN3</i> | direct overlap with NAHR, CNVs affecting the entire gene ( <i>ABCC6</i> ) or certain       |

|       |            |            |                    |                                                                                                                               |
|-------|------------|------------|--------------------|-------------------------------------------------------------------------------------------------------------------------------|
|       |            |            |                    | exons ( <i>CLN3</i> ) observed previously                                                                                     |
| chr16 | 31,961,153 | 33,864,470 |                    |                                                                                                                               |
| chr16 | 69,977,498 | 74,590,161 | <i>DHX38</i>       | direct overlap with NAHR, CNVs never described before                                                                         |
| chr17 | 2,954,154  | 3,156,719  |                    |                                                                                                                               |
| chr17 | 13,923,279 | 22,075,527 |                    |                                                                                                                               |
| chr17 | 28,927,470 | 30,415,970 |                    |                                                                                                                               |
| chr17 | 34,481,812 | 45,671,436 | <i>GPR179, GRN</i> | direct overlap with NAHR, CNVs in <i>GPR179</i> never described before and entire gene CNVs in <i>GRN</i> observed previously |
| chr17 | 57,650,241 | 58,079,963 |                    |                                                                                                                               |
| chr17 | 58,083,345 | 60,375,823 | <i>CA4</i>         | direct overlap with NAHR, CNVs affecting the entire gene observed previously but in a different phenotype                     |
| chr17 | 77,495,191 | 77,630,507 |                    |                                                                                                                               |
| chr18 | 10,604,201 | 12,231,380 |                    |                                                                                                                               |
| chr19 | 12,496,799 | 12,555,157 |                    |                                                                                                                               |
| chr19 | 20,504,255 | 20,595,412 |                    |                                                                                                                               |
| chr19 | 22,559,977 | 22,862,402 |                    |                                                                                                                               |
| chr19 | 36,758,541 | 37,796,694 |                    |                                                                                                                               |
| chr19 | 41,336,556 | 41,393,307 |                    |                                                                                                                               |
| chr19 | 43,233,122 | 43,801,771 |                    |                                                                                                                               |
| chr19 | 43,840,402 | 43,901,918 |                    |                                                                                                                               |
| chr19 | 48,406,743 | 51,126,682 | <i>CRX</i>         | 60kb away from NAHR, CNVs affecting certain exons observed before                                                             |
| chr20 | 25,733,092 | 26,084,413 |                    |                                                                                                                               |
| chr20 | 46,453,805 | 46,534,975 |                    |                                                                                                                               |
| chr21 | 9,645,548  | 10,203,948 |                    |                                                                                                                               |
| chr21 | 15,346,934 | 15,441,979 |                    |                                                                                                                               |
| chr22 | 17,005,667 | 25,080,013 |                    |                                                                                                                               |
| chr22 | 25,622,856 | 26,013,117 |                    |                                                                                                                               |

|       |             |             |                       |                                                                                           |
|-------|-------------|-------------|-----------------------|-------------------------------------------------------------------------------------------|
| chr22 | 42,902,112  | 42,978,456  |                       |                                                                                           |
| chrX  | 1,035,193   | 1,210,363   |                       |                                                                                           |
| chrX  | 3,734,603   | 3,856,330   |                       |                                                                                           |
| chrX  | 36,986,405  | 37,454,830  |                       |                                                                                           |
| chrX  | 47,863,712  | 48,002,428  |                       |                                                                                           |
| chrX  | 48,100,846  | 52,837,913  | <i>CACNA1F</i>        | direct overlap with NAHR, CNVs affecting certain exons observed before                    |
| chrX  | 52,903,909  | 53,006,000  |                       |                                                                                           |
| chrX  | 55,479,962  | 55,546,105  |                       |                                                                                           |
| chrX  | 62,347,592  | 62,470,907  |                       |                                                                                           |
| chrX  | 70,899,842  | 71,025,014  |                       |                                                                                           |
| chrX  | 71,955,011  | 72,210,791  |                       |                                                                                           |
| chrX  | 101,452,530 | 101,744,479 |                       |                                                                                           |
| chrX  | 103,223,668 | 103,324,337 |                       |                                                                                           |
| chrX  | 119,172,167 | 119,332,013 |                       |                                                                                           |
| chrX  | 120,063,235 | 120,120,871 |                       |                                                                                           |
| chrX  | 134,250,050 | 134,390,361 |                       |                                                                                           |
| chrX  | 134,745,204 | 134,812,220 |                       |                                                                                           |
| chrX  | 134,846,411 | 134,971,858 |                       |                                                                                           |
| chrX  | 139,086,368 | 139,311,560 |                       |                                                                                           |
| chrX  | 140,077,191 | 140,789,063 |                       |                                                                                           |
| chrX  | 148,613,958 | 149,116,021 |                       |                                                                                           |
| chrX  | 151,847,040 | 151,958,439 |                       |                                                                                           |
| chrX  | 152,229,636 | 152,560,433 |                       |                                                                                           |
| chrX  | 153,444,157 | 153,519,082 | <i>OPN1LW, OPN1MW</i> | adjacent and direct overlap with NAHR, CNVs affecting the entire gene observed previously |
| chrX  | 153,564,285 | 153,624,563 |                       |                                                                                           |
| chrX  | 153,783,899 | 153,877,056 | <i>IKBKG</i>          | direct overlap with NAHR, CNVs affecting the entire gene observed previously              |
| chrX  | 154,566,001 | 154,734,211 |                       |                                                                                           |
| chrY  | 15,438      | 116,217     |                       |                                                                                           |
| chrY  | 6,107,831   | 9,752,225   |                       |                                                                                           |

|      |            |            |  |  |
|------|------------|------------|--|--|
| chrY | 16,093,531 | 16,172,355 |  |  |
| chrY | 18,271,431 | 18,537,677 |  |  |
| chrY | 19,567,683 | 28,457,769 |  |  |
| chrY | 58,819,361 | 58,917,656 |  |  |

Supplementary Materials

**Table S3.** Patients' phenotypes

| Patient      | Age | Visual acuity |        | Visual fields (I-4e/V-4e)              |                                        | Scotopic ERG ( $\mu\text{V}$ ) |        | 30Hz ERG ( $\mu\text{V}$ ) |        | Photopic ERG implicit time (ms) |                | Additional features                                                                                                                                                                                                                                               |
|--------------|-----|---------------|--------|----------------------------------------|----------------------------------------|--------------------------------|--------|----------------------------|--------|---------------------------------|----------------|-------------------------------------------------------------------------------------------------------------------------------------------------------------------------------------------------------------------------------------------------------------------|
|              |     | OD            | OS     | OD                                     | OS                                     | OD                             | OS     | OD                         | OS     | OD                              | OS             |                                                                                                                                                                                                                                                                   |
| OGI-086-213  | 18  | 20/40         | 20/30  | 10°/60°                                | 10°/50°                                | ND                             | ND     | 0.36                       | 0.56   | 35                              | 37             | Anterior polar cataracts, nyctalopia and photophobia since early childhood, salt and pepper peripheral retinopathy fundus appearance                                                                                                                              |
| OGI-036-091  | 10  | 20/200        | 20/200 | 110°/full                              | 90°/full                               | 289                            | 295    | 0.88                       | 0.74   | 50                              | 47             | Abnormal color vision, nystagmus, fine pigment granularity in the maculas.                                                                                                                                                                                        |
| OGI-036-336  | 17  | 20/125        | 20/250 | 112°/full                              | 110°/full                              | 244                            | 201    | 0.48                       | 0.34   | 39                              | 40             | Abnormal color vision, nystagmus, fine pigment granularity in the maculas.                                                                                                                                                                                        |
| OGI-046-116  | 11  | 20/25         | 20/25  | constricted                            | constricted                            | NA                             | NA     | NA                         | NA     | NA                              | NA             | Elevated dark adaptation thresholds (2-3 log units), reported difficulties of night vision, bone-spicule pigmentation in retinal peripheries, thinning photoreceptor layers in the periphery as seen by OCT, normal color vision. No extra-ocular symptoms noted. |
| OGI-014-038* | 46  | LP            | 20/300 | minimal crescent in temporal periphery | minimal crescent in temporal periphery | ND                             | ND     | ND                         | ND     | ND                              | ND             | Absent color vision, nyctalopia at 15 years                                                                                                                                                                                                                       |
| OGI-023-057* | 11  | 20/125        | 20/160 | NA                                     | NA                                     | Normal                         | Normal | Absent                     | Absent | Not applicable                  | Not applicable | Nystagmus in infancy, exotropia, photophobia and abnormal color vision; amelogenesis imperfecta                                                                                                                                                                   |

Scotopic ERG: white stimulus 0.5Hz (normal range: 350-700  $\mu\text{V}$ ), 30Hz ERG: white stimulus (normal range: 50-125  $\mu\text{V}$ ), Implicit time (normal range: 25-32 ms). Color vision measured on Farnsworth D15 and /or Ishihara tests. \*These patients were seen at CHOP. An ISCEV-standard ERG was performed at CHOP in patient OGI-023-057. Abbreviations: NA: not available, ND: not detectable.



Supplementary Materials

**Table S4.** Rare variants found from WES

| Gene          | Refseq ID    | gDNA change                        | cDNA change    | Effect               | dbSNP       | 1000G MAF | ExAC MAF | OGI | GERP   | Sift | Pph2 | Ret Exp | Cosegregation |             |             |             |             |             |
|---------------|--------------|------------------------------------|----------------|----------------------|-------------|-----------|----------|-----|--------|------|------|---------|---------------|-------------|-------------|-------------|-------------|-------------|
| OGI-014       |              |                                    |                |                      |             |           |          |     |        |      |      |         | OGI-014-038   | OGI-014-039 | OGI-014-154 | OGI-014-289 |             |             |
| <i>PNPLA4</i> | NM_004650    | chrX:g.7870085G>A                  | c.575C>T       | p.P192L              | rs148618718 | 0.00%     | 0.02%    | 2   | 3.94   | D    | D    | 25.2    | hom           |             | het         |             |             |             |
| <i>XDH</i>    | NM_000379    | chr2:g.31557740delT                | c.*1084delA    | 3' UTR               | NA          | 0.00%     | 0.00%    | 2   | -0.234 | -    | -    | 6.5     | het           |             | het         |             |             |             |
| <i>XDH</i>    | NM_000379    | chr2:g.31564244A>G                 | c.3536T>C      | p.I1179T             | rs139515054 | 0.04%     | 0.37%    | 11  | 5.48   | D    | D    | 28.0    | het           | het         |             | het         |             |             |
| <i>CCDC66</i> | NM_001141947 | chr3:g.56600608A>G                 | c.545-14A>G    | Extended splice site | rs78488477  | 0.14%     | 0.33%    | 8   | 4.42   | -    | -    | -       | het           |             | het         |             |             |             |
| <i>CCDC66</i> | NM_001141947 | chr3:g.56655621A>G                 | c.2822A>G      | p.E941G              | rs144848139 | 0.06%     | 0.19%    | 12  | 5.37   | D    | D    | 21.3    | het           | het         |             |             |             |             |
| <i>IYD</i>    | NM_001164694 | chr6:g.150719248G>A                | c.857G>A       | p.G286D              | rs202223369 | 0.02%     | 0.01%    | 3   | -3.29  | D    | B    | 0.0     | het           |             | het         | het         |             |             |
| <i>IYD</i>    | NM_001164694 | chr6:g.150721206G>A                | c.*1933G>A     | 3' UTR               | rs146165286 | 0.08%     | 0.00%    | 6   | 1.23   | -    | -    | 0.0     | het           | het         |             |             |             |             |
| <i>STEAP2</i> | NM_001040665 | chr7:g.89856643A>G                 | c.851A>G       | p.Y284C              | rs138124501 | 0.14%     | 0.45%    | 13  | 6.04   | D    | D    | 6.0     | het           |             | het         |             |             |             |
| <i>STEAP2</i> | NM_001040665 | chr7:g.89863143A>G                 | c.*1205A>G     | 3' UTR               | NA          | 0.02%     | 0.00%    | 2   | 0.116  | -    | -    | 4.1     | het           | het         |             |             |             |             |
| <i>KRT84</i>  | NM_033045    | chr12:g.52774244G>A                | c.1327C>T      | p.R443W              | rs138689455 | 0.00%     | 0.01%    | 2   | 0.34   | D    | D    | 0.0     | het           |             | het         |             |             |             |
| <i>KRT84</i>  | NM_033045    | chr12:g.52779006A>C                | c.364T>G       | p.F122V              | rs144471272 | 0.04%     | 0.16%    | 6   | 5.05   | D    | D    | 0.1     | het           | het         |             | het         |             |             |
| <i>STARD9</i> | NM_020759    | chr15:g.42979360_42979365delAGCACA | c.5584_5589del | p.S1862_T1863del     | NA          | 0.06%     | 0.14%    | 3   | -7.43  | -    | -    | 3.2     | het           | het         |             | het         |             |             |
| <i>STARD9</i> | NM_020759    | chr15:g.42982579G>C                | c.8803G>C      | p.E2935Q             | rs201158158 | 0.00%     | 0.00%    | 2   | 3.82   | T    | -    | 3.2     | het           |             | het         |             |             |             |
| <i>MYO1C</i>  | NM_001080779 | chr17:g.1384184G>T                 | c.628-5C>A     | Extended splice site | rs201919233 | 0.12%     | 0.15%    | 9   | 1.72   | -    | -    | -       | het           | het         |             |             |             |             |
| <i>MYO1C</i>  | NM_001080779 | chr17:g.1387470C>T                 | c.203G>A       | p.R68Q               | NA          | 0.02%     | 0.01%    | 2   | 3.55   | T    | P    | 17.5    | het           |             | het         |             |             |             |
| OGI-036       |              |                                    |                |                      |             |           |          |     |        |      |      |         | OGI-036-091   | OGI-036-336 | OGI-036-753 | OGI-036-333 | OGI-036-334 | OGI-036-335 |
| <i>GPM6B</i>  | NM_001001995 | chrX:g.13790475A>G                 | c.*525T>C      | 3' UTR               | rs189371743 | 0.32%     | 0.00%    | 23  | -6.56  | -    | -    | 43.7    | hom           | hom         | hom         | het         | -           |             |
| <i>DMD</i>    | NM_004007    | chrX:g.31792064T>C                 | c.7173+13A>G   | Extended splice site | rs72466585  | 0.32%     | 0.39%    | 21  | -2.82  | -    | -    | -       | hom           | hom         | hom         | het         | -           |             |
| <i>ZNF449</i> | NM_152695    | chrX:g.134496662A>G                | c.*1661A>G     | 3' UTR               | NA          | 0.00%     | 0.00%    | 5   | 3.32   | -    | -    | 1.8     | hom           | hom         | hom         | het         | -           |             |
| <i>MMGT1</i>  | NM_173470    | chrX:g.135044584A>G                | c.*2599T>C     | 3' UTR               | NA          | 0.00%     | 0.00%    | 5   | 3.56   | -    | -    | 11.4    | hom           | hom         | hom         | het         | -           |             |
| OGI-046       |              |                                    |                |                      |             |           |          |     |        |      |      |         | OGI-046-116   |             | OGI-046-114 |             | OGI-046-115 |             |

Supplementary Materials

|                 |              |                              |              |                      |             |       |       |    |         |   |    |                    |                    |                    |                    |
|-----------------|--------------|------------------------------|--------------|----------------------|-------------|-------|-------|----|---------|---|----|--------------------|--------------------|--------------------|--------------------|
| <i>CHDC2</i>    | NM_173695    | chrX:g.36091382A>G           | c.317A>G     | p.Y106C              | rs146638559 | 0.00% | 0.00% | 2  | -7.57   | T | B  | 0.3                | hom                |                    | het                |
| <i>ZBTB33</i>   | NM_006777    | chrX:g.119389143C>T          | c.1873C>T    | p.P625S              | rs79151935  | 0.00% | 0.04% | 3  | 4.96    | T | D  | 6.5                | hom                |                    | het                |
| <i>PNMA3</i>    | NM_013364.4  | chrX:g.152226562C>T          | c.1150C>T    | p.R384W              | rs144738062 | 0.00% | 0.02% | 2  | -0.0351 | D | P  | 1.1                | hom                |                    | het                |
| <i>TAZ</i>      | NM_000116    | chrX:g.153648024C>T          | c.542-20C>T  | Extended splice site | rs373841640 | 0.00% | 0.04% | 2  | -1.66   | - | -  | 8.3                | hom                |                    | het                |
| <i>SNRNP200</i> | NM_014014    | chr2:g.96954816G>T           | c.3133C>A    | p.P1045T             | NA          | 0.00% | 0.00% | 2  | 5.5     | D | NA | 175.5              | hom                | het                |                    |
| <i>ABCA12</i>   | NM_173076    | chr2:g.215914490A>G          | c.553T>C     | p.C185R              | NA          | 0.00% | 0.00% | 2  | 6.05    | D | D  | 4.1                | hom                | het                |                    |
| <i>CLDN1</i>    | NM_021101    | chr3:g.190030679C>T          | c.370G>A     | p.A124T              | rs140846629 | 0.14% | 0.38% | 1  | 2.79    | D | B  | 76.9               | hom                |                    |                    |
| <i>IFT52</i>    | NM_016004    | chr20:g.42265804G>A          | c.1031G>A    | p.R344Q              | rs145627647 | 0.06% | 0.06% | 6  | 5.27    | T | P  | 24.4               | hom                | het                | het                |
| <i>DGCR6L</i>   | NM_033257    | chr22:g.20303706G>A          | c.308C>T     | p.A103V              | NA          | 0.00% | 0.02% | 1  | 1.98    | T | B  | 40.5               | hom                |                    |                    |
| <i>DIEXF</i>    | NM_014388    | chr1:g.210024715G>A          | c.2194G>A    | p.V732M              | rs61742373  | 0.12% | 0.06% | 3  | 5.95    | D | D  | 1.2                | het                |                    | het                |
| <i>DIEXF</i>    | NM_014388    | chr1:g.210030577T>C          | c.*5785T>C   | 3' UTR               | NA          | 0.00% | 0.00% | 2  | -0.145  | - | -  | 1.2                | het                | het                |                    |
| <i>PLEC</i>     | NM_201384    | chr8:g.144996761C>T          | c.7336G>A    | p.E2446K             | NA          | 0.00% | 0.00% | 2  | 4.56    | D | P  | 16.1               | het                | het                |                    |
| <i>PLEC</i>     | NM_201384    | chr8:g.144999731C>T          | c.4366G>A    | p.V1456M             | rs186848953 | 0.16% | 0.48% | 7  | 3.56    | D | NA | 16.1               | het                |                    | het                |
| <i>SLC15A4</i>  | NM_145648.3  | chr12:g.129278784T>G         | c.1691A>C    | p.Q564P              | NA          | 0.00% | 0.00% | 2  | 5.27    | T | B  | 32.9               | het                |                    | het                |
| <i>SLC15A4</i>  | NM_145648.3  | chr12:g.129299388G>A         | c.774C>T     | p.(=)                | NA          | 0.02% | 0.03% | 2  | -11.4   | - | -  | 23.3               | het                | het                |                    |
| <i>CACNA1I</i>  | NM_021096    | chr22:g.40058393A>T          | c.3325A>T    | p.M1109L             | rs58021347  | 0.10% | 0.28% | 14 | 5.1     | T | -  | 0.9                | het                | het                |                    |
| <i>CACNA1I</i>  | NM_021096    | chr22:g.40082469G>A          | c.*59G>A     | 3'UTR                | NA          | 0.00% | 0.00% | 10 | 3.95    | - | -  | 1.6                | het                |                    | het                |
| <b>OGI-086</b>  |              |                              |              |                      |             |       |       |    |         |   |    | <b>OGI-086-213</b> | <b>OGI-086-215</b> | <b>OGI-086-214</b> | <b>OGI-086-635</b> |
| <i>FAM9A</i>    | NM_174951    | chrX:g.8763254_8763256delCTC | c.694_696del | p.E232del            | NA          | 0.00% | 0.44% | 8  | 0       | - | -  | 0.0                | hom                |                    | het                |
| <i>AMELX</i>    | NM_182680    | chrX:g.11316275A>G           | c.144+11A>G  | Extended splice site | rs200163085 | 0.34% | 0.49% | 18 | -2.49   | - | -  | -                  | hom                |                    | het                |
| <i>SSX5</i>     | NM_021015    | chrX:g.48054711T>A           | c.69+15A>T   | Extended splice site | rs199714668 | 0.00% | 0.06% | 6  | -1.73   | - | -  | -                  | hom                |                    | het                |
| <i>PHKA1</i>    | NM_001122670 | chrX:g.71856147T>C           | c.1549A>G    | p.I517V              | NA          | 0.00% | 0.00% | 4  | 5.96    | D | B  | 17.4               | hom                |                    | het                |
| <i>BARX2</i>    | NM_003658.4  | chr11:g.129306573G>A         | c.188-73G>A  | Extended splice site | NA          | 0.00% | 0.00% | 8  | 0.278   | - | -  | 2.7                | hom                | het                | het                |
| <i>PON3</i>     | NM_000940    | chr7:g.94989379C>T           | c.971G>A     | p.G324D              | rs139856535 | 0.16% | 0.28% | 10 | 4.7     | D | D  | 0.8                | het                | het                |                    |

Supplementary Materials

|             |              |                         |           |         |                 |       |       |    |      |   |   |      |     |     |     |     |
|-------------|--------------|-------------------------|-----------|---------|-----------------|-------|-------|----|------|---|---|------|-----|-----|-----|-----|
| <i>PON3</i> | NM_000940    | chr7:g.95001590T<br>>C  | c.262A>G  | p.M88V  | rs78883915      | 0.04% | 0.09% | 14 | 3.67 | D | B | 2.2  | het | het |     | het |
| <i>PDHX</i> | NM_001135024 | chr11:g.34982064<br>G>C | c.595G>C  | p.E199Q | rs14644574<br>4 | 0.00% | 0.04% | 12 | 5.99 | T | P | 49.0 | het | het |     | het |
| <i>PDHX</i> | NM_001135024 | chr11:g.35016546<br>T>G | c.1288T>G | p.F430V | rs14794871<br>6 | 0.16% | 0.13% | 7  | 6.04 | T | P | 14.9 | het |     | het |     |

**Abbreviations:** dbSNP – Single Nucleotide Polymorphism database (<http://www.ncbi.nlm.nih.gov/SNP/>), MAF – minor allele frequency, 1000G – 1000 Genomes Project (<http://www.1000genomes.org/>), ExAC- Exome Aggregation Consortium (<http://exac.broadinstitute.org/>), OGI – Ocular Genomics Institute internal frequency database, Genomic Evolutionary Rate Profiling (GERP), Pph – Polyphen2, Ret Exp – retinal expression based on the study of <sup>2</sup>, similar retinal expression was seen in Human Proteome Map <sup>3</sup>.

Supplementary Materials

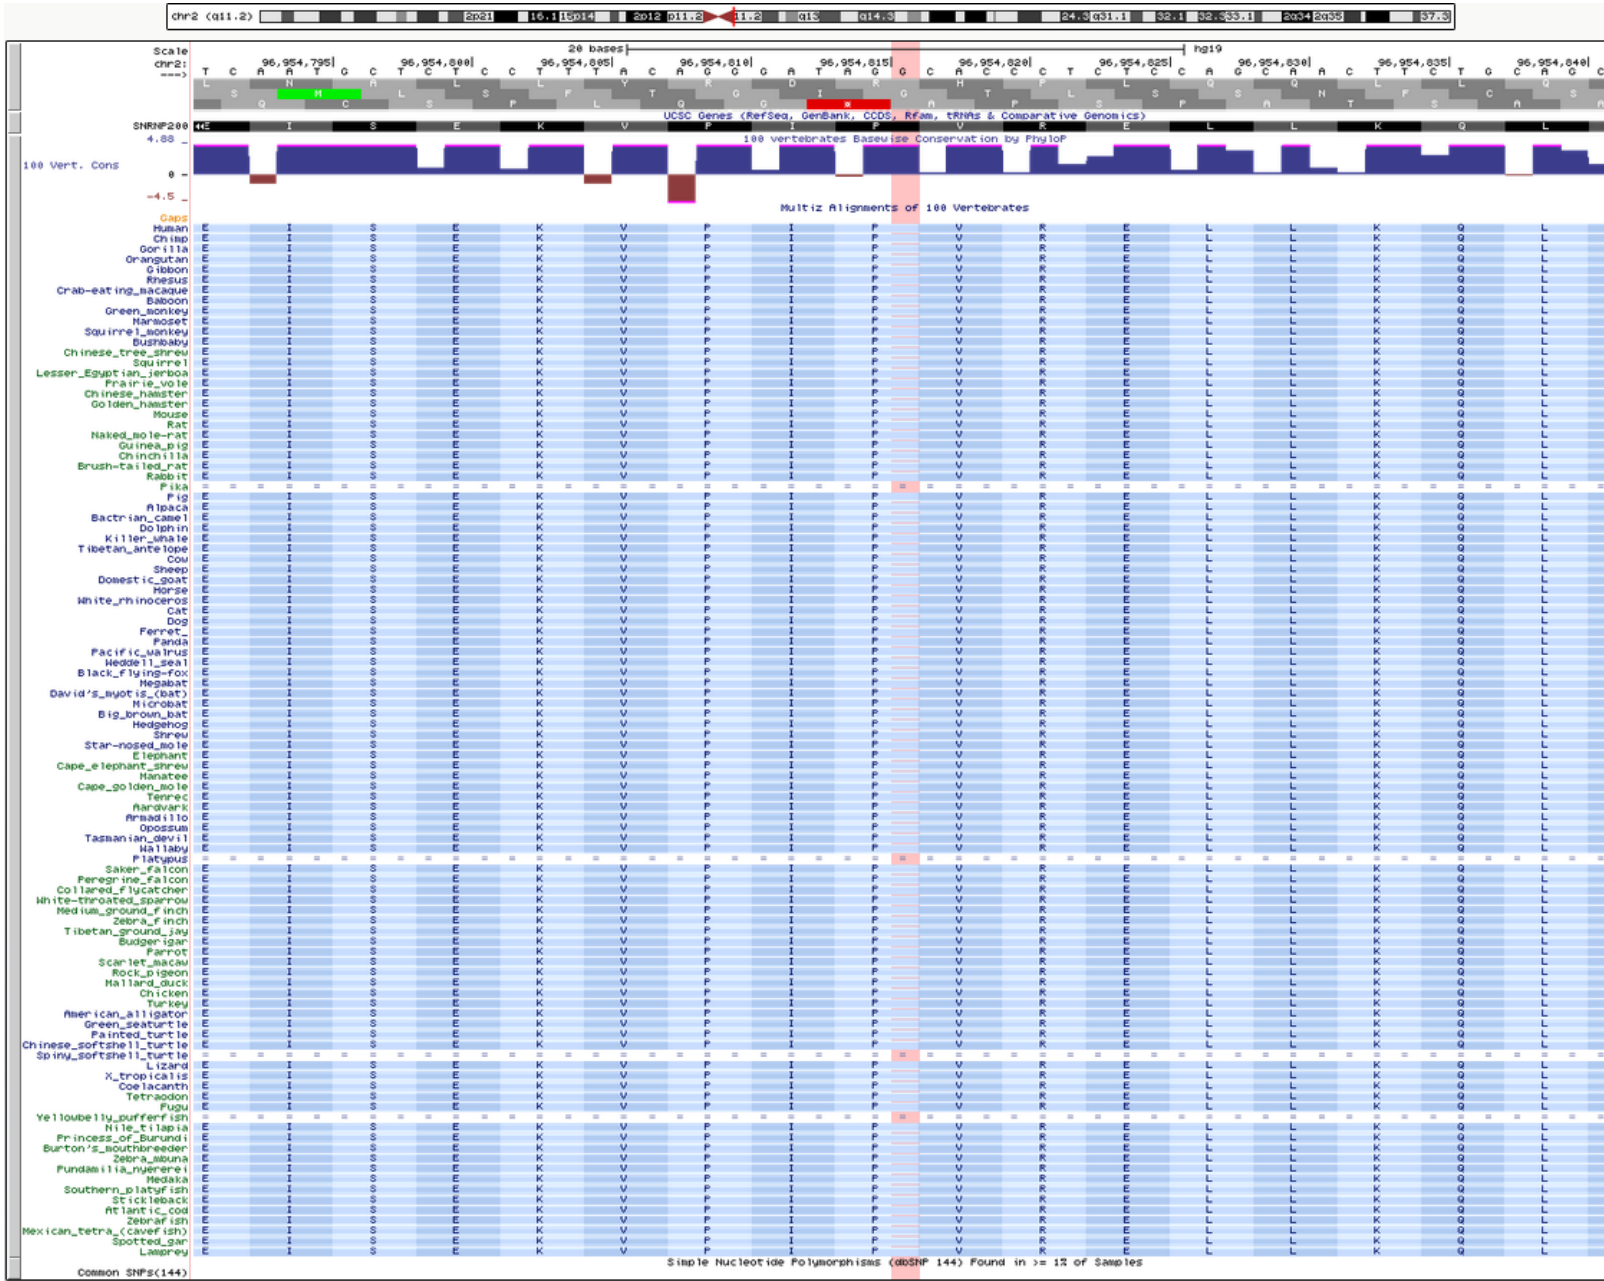

Figure S1. Conservation of the P1045 residue in SNRP200

**A**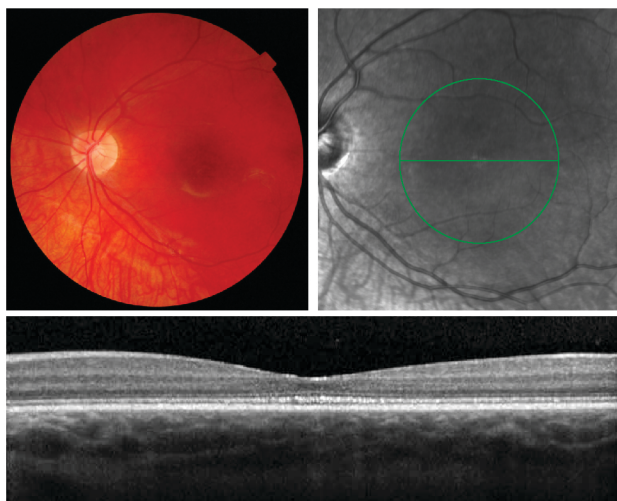**B**

Family OGI-036  
M: chrX:153400587\_153453251del

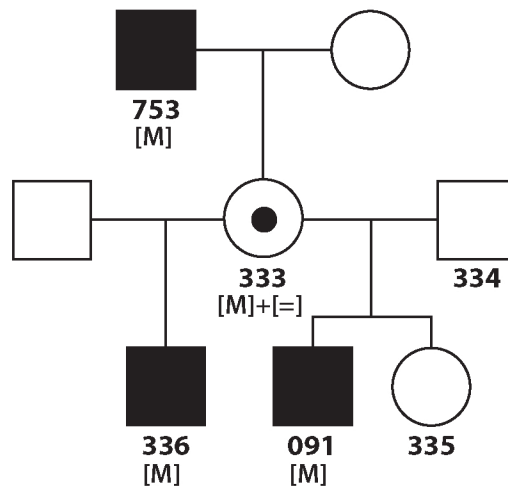**C**

Locus organization

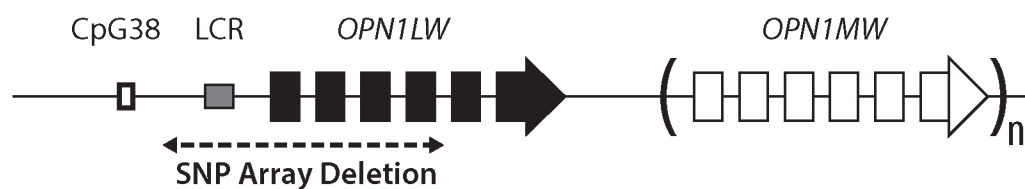**D**

PCR of LCR and upstream sequences

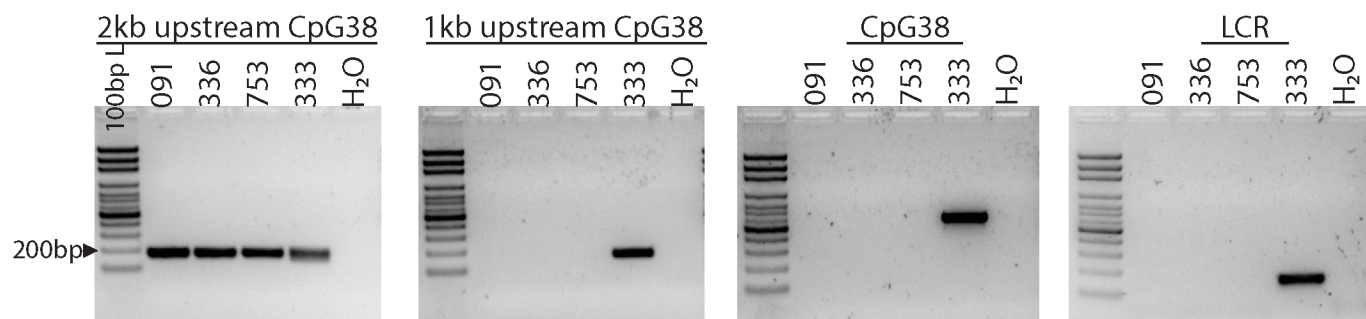**E**

PCR across the breakpoints and Sanger sequencing

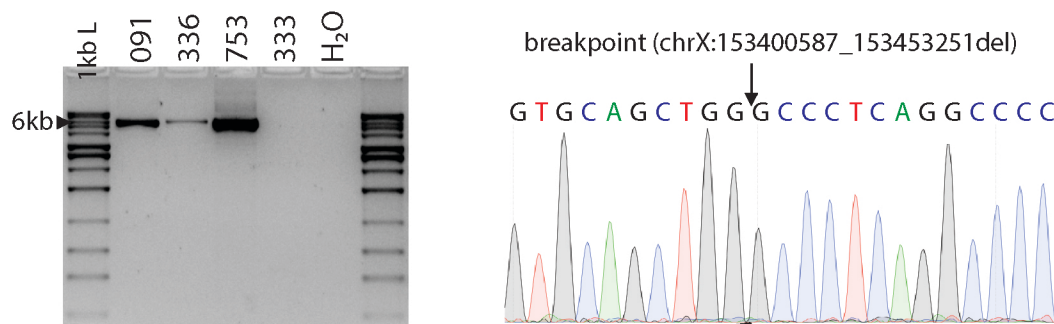**F**

OGI-036 deletion

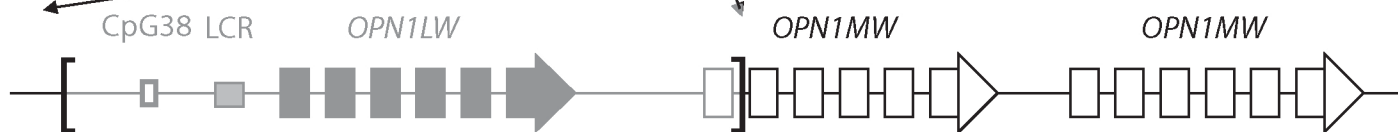

**Figure S2. Deletion mapping in family OGI-036.** A) Phenotype of patient OGI-036-091, represented by color fundus photograph of the left eye (top left), infrared fundus reference image (top right) and OCT cross-sectional scan (bottom). B) Pedigree of family OGI-036 with mutant allele segregation. C) Organization of the long wavelength (*OPN1LW*) and the medium wavelength (*OPN1LM*) opsin genomic region with locus control region (LCR) and a CpG island. The deletion detected by the Omni 2.5 SNP array is indicated by a dashed arrow. D) PCR amplification of selected regions upstream of the *OPN1LW* gene. E) PCR amplification across the breakpoints and Sanger sequencing electropherogram showing the precise position of the deletion. F) A map of the deleted region.

#### References:

1. Hoebeeck J, van der Luijt R, Poppe B, et al. Rapid detection of VHL exon deletions using real-time quantitative PCR. *Lab Invest.* 2005;85(1):24–33. doi:10.1038/labinvest.3700209.
2. Farkas M, Grant G, White J, Sousa M, Consugar M, Pierce E. Transcriptome analyses of the human retina identify unprecedented transcript diversity and 3.5 Mb of novel transcribed sequence via significant alternative splicing and novel genes. *BMC Genomics.* 2013;14(486).
3. Kim M-S, Pinto SM, Getnet D, et al. A draft map of the human proteome. *Nature.* 2014;509(7502):575–81. doi:10.1038/nature13302.
